# Supplementary material
Source: Springer Nature journal article supplement (https://www.springermedizin.de/resource/supplementary/12885_2010_2427_MOESM9_ESM.pdf/9461266)
Supplement: MOESM9 [file 9461266]

## Comparison

## Metabolic differences

## Enriched GO-terms

A1 vs A2

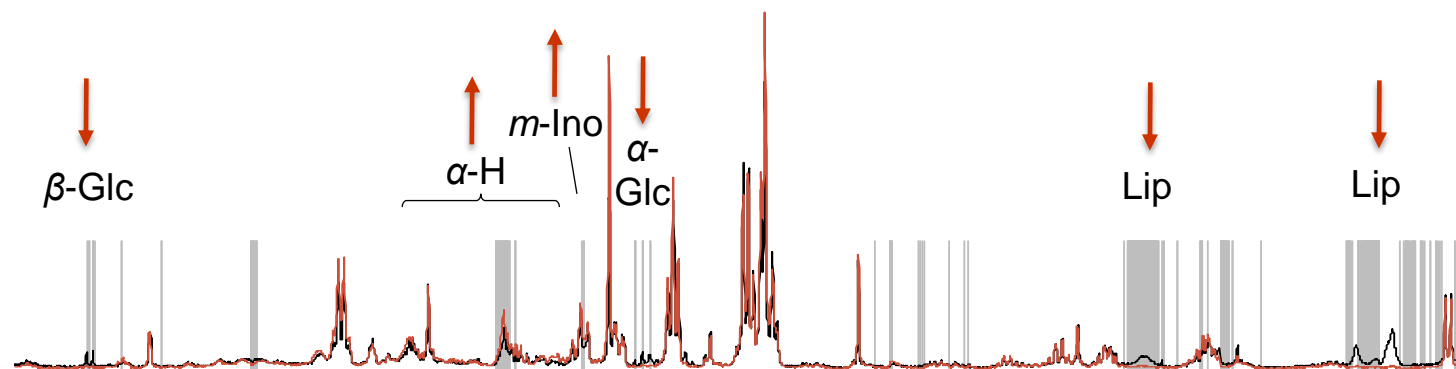

A3 vs A1

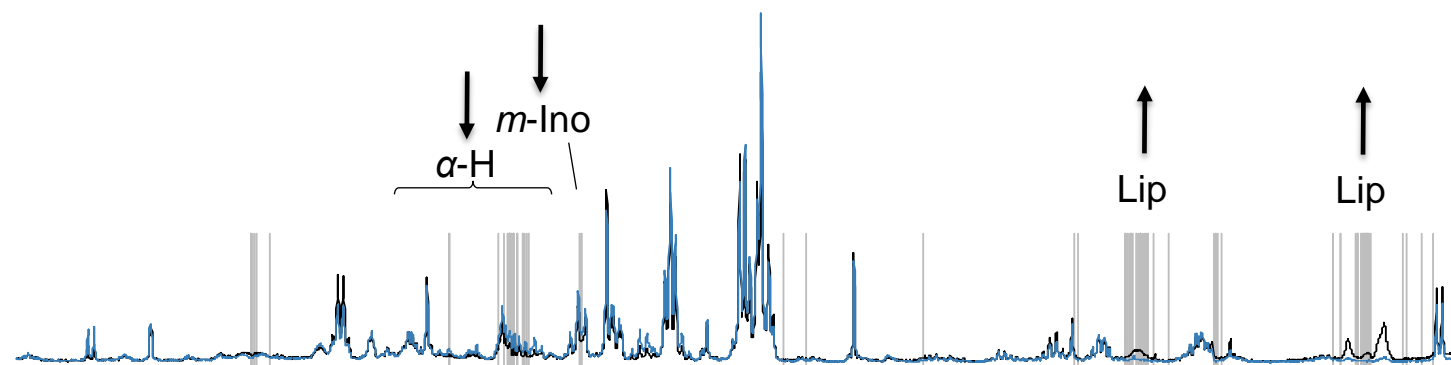

A2 vs A3

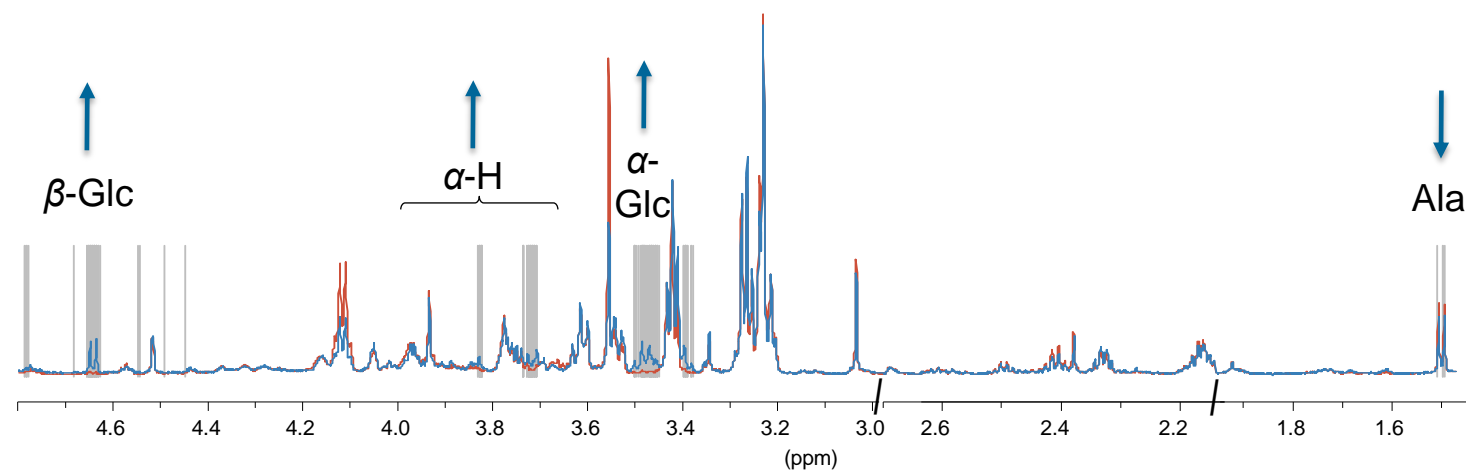

| GO-category | GO-term                    | GSA score | p-value |
|-------------|----------------------------|-----------|---------|
| BP          | MEIOSIS_I                  | 1.80      | 0       |
|             | MEIOTIC_RECOMBINATION      | 1.80      | 0       |
|             | DOUBLE_STRAND_BREAK_REPAIR | 2.51      | 0.0001  |

No significant GO-terms

|    |                            |       |   |
|----|----------------------------|-------|---|
| MF | PROTEIN_C_TERMINUS_BINDING | -0.91 | 0 |
|----|----------------------------|-------|---|
